# Supplementary material for: Cytomegalovirus late transcription factor target sequence diversity orchestrates viral early to late transcription
Source: PubMed Central journal article supplement (PMC8360532; doi:10.1371/journal.ppat.1009796), 2021-08-02
Supplement: ppat.1009796.s007.pdf [file ppat.1009796.s007.pdf]

**TABLE S1. Nucleic Acid Reagents****A. Oligonucleotides and Gene Blocks**

| Oligo Name                     | Direction | Sequence (5'-to-3')                                                                                                                                                                                                                                                                                                                                                                                                                             |
|--------------------------------|-----------|-------------------------------------------------------------------------------------------------------------------------------------------------------------------------------------------------------------------------------------------------------------------------------------------------------------------------------------------------------------------------------------------------------------------------------------------------|
| <b>BAC Construction Oligos</b> |           |                                                                                                                                                                                                                                                                                                                                                                                                                                                 |
| TB40/E UL79N-galk              | Forward   | TGCTCGTCCATCGTCATTGTCCTCACCGTCGCTACCCGCTCACCGAGCGAACGTCAGCACTGTCCTGCTCCTT                                                                                                                                                                                                                                                                                                                                                                       |
| TB40/E UL79N-galk              | Reverse   | TTGCCCGTGC GGACCCGCGGGACGGCGGGGTTCTCTTCGTCGCGGGCCATCCTGTTGACAATTAATCATCGGCA                                                                                                                                                                                                                                                                                                                                                                     |
| TB40/E UL79C-galk              | Forward   | GGCCGTA CTGGCCGCCCGCGCCCTTCATATGCCGACGCTGGCTAACGACGTGTCAGCACTGTCCTGCTCCTT                                                                                                                                                                                                                                                                                                                                                                       |
| TB40/E UL79C-galk              | Reverse   | GCGCTGTACGGCAGCGGGGAGAAAAGTGGCAGATAAA TCACGTCAGGTTACCTGTTGACAATTAATCATCGGCA                                                                                                                                                                                                                                                                                                                                                                     |
| <b>Sequencing Oligos</b>       |           |                                                                                                                                                                                                                                                                                                                                                                                                                                                 |
| TB40/E UL79N                   | Forward   | GACTGGTCGTAGCGGGCGAG                                                                                                                                                                                                                                                                                                                                                                                                                            |
|                                | Reverse   | CGCGGTGAAAGAGGAGGACGC                                                                                                                                                                                                                                                                                                                                                                                                                           |
| TB40/E UL79C                   | Forward   | CCACAACAGCAGCAGCACCACCAC                                                                                                                                                                                                                                                                                                                                                                                                                        |
|                                | Reverse   | TGTTTCGGCCGAAAGTTCCTCCGTC                                                                                                                                                                                                                                                                                                                                                                                                                       |
| Towne UL87C                    | Forward   | AAGATCAAGCACACTTGCGCGCTC                                                                                                                                                                                                                                                                                                                                                                                                                        |
|                                | Reverse   | GCGGTAACACACGGCGAATCAGTT                                                                                                                                                                                                                                                                                                                                                                                                                        |
| <b>Gene Blocks (dsDNA)</b>     |           |                                                                                                                                                                                                                                                                                                                                                                                                                                                 |
| TB40/E UL79N-HA                |           | TGCTCGTCCATCGTCATTGTCCTCACCGTCGCTACCCGCTCACCGAGCGAACGATGTACCCATACGATGTTCCAGATTACGCTCTGATGGCCC GCGACGAAGAGAACCCCGCGGTCCCGCGGGTCCGCACGGGCAAATTC                                                                                                                                                                                                                                                                                                   |
| TB40/E UL79C-FKBP12            |           | GGCCGTA CTGGCCGCCCGCGCCCTTCATATGCCGACGCTGGCTAACGACGTGGGAGTGCAGGTGGA AACCATCTCCCCAGGAGACGGCGGCACCTTCCCCAAGCGCGGCCAGACCTGCGTGGTGC ACTACACCGGGATGCTTGAAGATGGA AAGAAAGTTGATTCCTCCCGGGA CAGAAACAAGCCCTTTAAGTTTATGCTAGGCAAGCAGGAGGTGATCCGAGGCTGGGAAGAAGGGGTTGCCAGATGAGTGTGGGTCA GAGAGCCAAACTGACTATATCTCCAGATTATGCCTATGGTGCCA CTGGGCACCCAGGCATCATCCACCACATGCCACTCTCGTCTTCGATGTGGAGCTTCTAAA ACTGGAATGAACCTGACGTGATTTATCTGCCACTTTTCTCCCCGCTGCCGTACAGCGCC |

**B. Adapters and Illumina index primers****Adapters**

VRA3-8N:

/5Phos/rNrNrNrNrNrNrNrNrNrNrGrArUrCrGrUrCrGrGrArCrUrGrUrArGrArArCrUrCrUrGrArArC/3Inv dT/

VRA5-8N: rCrCrUrUrGrGrCrArCrCrGrArGrArArUrUrCrCrArNrNrNrNrNrNrNrN

**Illumina index primers**

RP1: AATGATACGGCGACCACCGAGATCTACACGTT CAGAGTTCTACAGTCCGA

---

RPI-1 [ATCACG]:  
CAAGCAGAAGACGGCATAACGAGATCGTGATGTGACTGGAGTTCCTTGGCACCCGAGAAT  
TCCA

---

RPI-2 [CGATGT]:  
CAAGCAGAAGACGGCATAACGAGATACATCGGTGACTGGAGTTCCTTGGCACCCGAGAAT  
TCCA

---

RPI-3 [TTAGGC]:  
CAAGCAGAAGACGGCATAACGAGATGCCTAAGTGACTGGAGTTCCTTGGCACCCGAGAAT  
TCCA

---

RPI-4 [TGACCA]:  
CAAGCAGAAGACGGCATAACGAGATTGGTCAGTGACTGGAGTTCCTTGGCACCCGAGAAT  
TCCA

---

RPI-5 [ACAGTG]:  
CAAGCAGAAGACGGCATAACGAGATCACTGTGTGACTGGAGTTCCTTGGCACCCGAGAAT  
TCCA

---

RPI-6 [GCCAAT]:  
CAAGCAGAAGACGGCATAACGAGATATTGGCGTGACTGGAGTTCCTTGGCACCCGAGAAT  
TCCA

---

RPI-7 [CAGATC]:  
CAAGCAGAAGACGGCATAACGAGATGATCTGGTGACTGGAGTTCCTTGGCACCCGAGAAT  
TCCA

---

RPI-8 [ACTTGA]:  
CAAGCAGAAGACGGCATAACGAGATTCAAGTGTGACTGGAGTTCCTTGGCACCCGAGAAT  
TCCA

---

RPI-9 [GATCAG]:  
CAAGCAGAAGACGGCATAACGAGATCTGATCGTGACTGGAGTTCCTTGGCACCCGAGAAT  
TCCA

---

RPI-10 [TAGCTT]:  
CAAGCAGAAGACGGCATAACGAGATAAGCTAGTGACTGGAGTTCCTTGGCACCCGAGAAT  
TCCA

---

RPI-11 [GGCTAC]:  
CAAGCAGAAGACGGCATAACGAGATGTAGCCGTGACTGGAGTTCCTTGGCACCCGAGAA  
TTCCA

---

RPI-12 [CTTGTA]:  
CAAGCAGAAGACGGCATAACGAGATTACAAGGTGACTGGAGTTCCTTGGCACCCGAGAAT  
TCCA

---

RPI-18 [GTCCGC]:  
CAAGCAGAAGACGGCATAACGAGATGCGGACGTGACTGGAGTTCCTTGGCACCCGAGAA  
TTCA

---

RPI-19 [GTGAAA]:  
CAAGCAGAAGACGGCATAACGAGATTTTCACGTGACTGGAGTTCCTTGGCACCCGAGAAT  
TCCA

---

RPI-22 [CGTACG]:  
CAAGCAGAAGACGGCATAACGAGATCGTACGGTGACTGGAGTTCCTTGGCACCCGAGAA  
TTCCA

---

RPI-25 [ACTGAT]:  
CAAGCAGAAGACGGCATAACGAGATATCAGTGTGACTGGAGTTCCTTGGCACCCGAGAAT  
TCCA

---

RPI-27 [ATTCCT]:  
CAAGCAGAAGACGGCATAACGAGATAGGAATGTGACTGGAGTTCCTTGGCACCCGAGAAT  
TCCA

---

RPI-29 [CAACTA]:

CAAGCAGAAGACGGCATACGAGATTAGTTGGTGACTGGAGTTCCTTGGCACCCGAGAAT  
TCCA

---
