# Supplementary material for: Cytomegalovirus late transcription factor target sequence diversity orchestrates viral early to late transcription
Source: PubMed Central journal article supplement (PMC8360532; doi:10.1371/journal.ppat.1009796), 2021-08-02
Supplement: ppat.1009796.s008.pdf [file ppat.1009796.s008.pdf]

**TABLE S2. PRO-Seq and ChIP-Seq Datasets****A. Scaling factors for Towne UL87<sup>H</sup>F PRO-Seq datasets**

| <b>Exp1 datasets</b>               | <b>Total deduplicated reads</b> | <b>Total read correction factor</b> | <b>Human mapped reads</b>       | <b>CMV mapped reads</b>           | <b>Spike-in mapped reads</b>   |
|------------------------------------|---------------------------------|-------------------------------------|---------------------------------|-----------------------------------|--------------------------------|
| Exp1 96 hpi Flavo                  | 24023580                        | 0.998587055                         | 18851095                        | 5007315                           | 165170                         |
| Exp1 96 hpi Flavo 2 h dTAG         | 26937463                        | 0.890567757                         | 20449921                        | 6276283                           | 211259                         |
| Exp1 96 hpi Flavo 6 h dTAG         | 18217973                        | 1.316811481                         | 15019743                        | 3057499                           | 140731                         |
| Exp1 96 hpi Flavo 6 h PFA          | 26432633                        | 0.907576479                         | 17028368                        | 9234949                           | 169316                         |
| Exp1 96 hpi Flavo 2 h dTAG 6 h PFA | 24336531                        | 0.985745914                         | 21952032                        | 2166147                           | 218352                         |
| <b>Exp1 datasets</b>               | <b>Corrected human reads</b>    | <b>Corrected CMV reads</b>          | <b>Corrected spike-in reads</b> | <b>Spike-in correction factor</b> | <b>Final correction factor</b> |
| Exp1 96 hpi Flavo                  | 18824459                        | 5000240                             | 164937                          | 1.10                              | 1.10                           |
| Exp1 96 hpi Flavo 2 h dTAG         | 18212040                        | 5589455                             | 188140                          | 0.96                              | 0.86                           |
| Exp1 96 hpi Flavo 6 h dTAG         | 19778170                        | 4026150                             | 185316                          | 0.98                              | 1.29                           |
| Exp1 96 hpi Flavo 6 h PFA          | 15454546                        | 8381423                             | 153667                          | 1.18                              | 1.07                           |
| Exp1 96 hpi Flavo 2 h dTAG 6 h PFA | 21639126                        | 2135271                             | 215240                          | 0.84                              | 0.83                           |
| <b>Exp2 Flavo datasets</b>         | <b>Total deduplicated reads</b> | <b>Total read correction factor</b> | <b>Human mapped reads</b>       | <b>CMV mapped reads</b>           | <b>Spike-in mapped reads</b>   |
| Exp2 72 hpi Flavo                  | 32394120                        | 1.004790538                         | 26143033                        | 6006885                           | 244202                         |
| Exp2 72 hpi Flavo 6 h dTAG         | 34827770                        | 0.934579080                         | 29698944                        | 4863931                           | 264895                         |
| Exp2 72 hpi Flavo 6 h PFA          | 34021716                        | 0.956721444                         | 27044218                        | 6639954                           | 337544                         |
| Exp2 72 hpi Flavo 6 h dTAG 6 h PFA | 28953615                        | 1.124187955                         | 24659862                        | 4037504                           | 256249                         |
| <b>Exp2 Flavo datasets</b>         | <b>Corrected human reads</b>    | <b>Corrected CMV reads</b>          | <b>Corrected spike-in reads</b> | <b>Spike-in correction factor</b> | <b>Final correction factor</b> |
| Exp2 72 hpi Flavo                  | 26268272                        | 6035661                             | 245372                          | 1.12                              | 1.13                           |
| Exp2 72 hpi Flavo 6 h dTAG         | 27756012                        | 4545728                             | 247565                          | 1.11                              | 1.04                           |
| Exp2 72 hpi Flavo 6 h PFA          | 25873783                        | 6352586                             | 322936                          | 0.85                              | 0.82                           |
| Exp2 72 hpi Flavo 6 h dTAG 6 h PFA | 27722320                        | 4538913                             | 288072                          | 0.96                              | 1.08                           |
| <b>Exp2 No Flavo datasets</b>      | <b>Total deduplicated reads</b> | <b>Total read correction factor</b> | <b>Human mapped reads</b>       | <b>CMV mapped reads</b>           | <b>Spike-in mapped reads</b>   |
| Exp2 72 hpi                        | 30873452                        | 1.074872612                         | 20451064                        | 10262890                          | 159498                         |
| Exp2 72 hpi 6 h dTAG               | 35496604                        | 0.934878953                         | 23986562                        | 11307455                          | 202587                         |
| <b>Exp2 No Flavo datasets</b>      | <b>Corrected human reads</b>    | <b>Corrected CMV reads</b>          | <b>Corrected spike-in reads</b> | <b>Spike-in correction factor</b> | <b>Final correction factor</b> |

|                       |                                 |                                     |                                 |                                   |                                |
|-----------------------|---------------------------------|-------------------------------------|---------------------------------|-----------------------------------|--------------------------------|
| Exp2 72 hpi           | 21982289                        | 11031299                            | 171440                          | 1.05                              | 1.13                           |
| Exp2 72 hpi 6 h dTAG  | 22424532                        | 10571102                            | 189394                          | 0.95                              | 0.89                           |
| <b>Exp3 datasets</b>  | <b>Total deduplicated reads</b> | <b>Total read correction factor</b> | <b>Human mapped reads</b>       | <b>CMV mapped reads</b>           | <b>Spike-in mapped reads</b>   |
| Exp3 72 hpi Flavo     | 54772298                        | 0.945175388                         | 46600030                        | 7108313                           | 1063955                        |
| Exp3 72 hpi PFA Flavo | 48766558                        | 1.061576419                         | 47466554                        | 433037                            | 866967                         |
| <b>Exp3 datasets</b>  | <b>Corrected human reads</b>    | <b>Corrected CMV reads</b>          | <b>Corrected spike-in reads</b> | <b>Spike-in correction factor</b> | <b>Final correction factor</b> |
| Exp3 72 hpi Flavo     | 44045201                        | 6718602                             | 1005624                         | 0.96                              | 0.91                           |
| Exp3 72 hpi PFA Flavo | 50389374                        | 459702                              | 920352                          | 1.05                              | 1.11                           |

### B. Scaling factors for TB40/E UL79<sup>H</sup>F and WT PRO-Seq datasets

|                                            |                                 |                                     |                                 |                                   |                                |
|--------------------------------------------|---------------------------------|-------------------------------------|---------------------------------|-----------------------------------|--------------------------------|
| <b>No Flavo datasets</b>                   | <b>Total deduplicated reads</b> | <b>Total read correction factor</b> | <b>Human mapped reads</b>       | <b>CMV mapped reads</b>           | <b>Spike-in mapped reads</b>   |
| Exp1 72 hpi UL79 <sup>H</sup> F            | 43312823                        | 1.060794710                         | 36709883                        | 5851979                           | 750961                         |
| Exp1 72 hpi UL79 <sup>H</sup> F dTAG       | 48579204                        | 0.945795932                         | 41802654                        | 5725503                           | 1051047                        |
| <b>No Flavo datasets</b>                   | <b>Corrected human reads</b>    | <b>Corrected CMV reads</b>          | <b>Corrected Spike-in reads</b> | <b>Spike-in correction factor</b> | <b>Final correction factor</b> |
| Exp1 72 hpi UL79 <sup>H</sup> F            | 38941650                        | 6207748                             | 796615                          | 1.12                              | 1.06                           |
| Exp1 72 hpi UL79 <sup>H</sup> F dTAG       | 39536780                        | 5415157                             | 994076                          | 0.90                              | 0.95                           |
| <b>Flavo datasets</b>                      | <b>Total deduplicated reads</b> | <b>Total read correction factor</b> | <b>Human mapped reads</b>       | <b>CMV mapped reads</b>           | <b>Spike-in mapped reads</b>   |
| Exp1 72 hpi UL79 <sup>H</sup> F Flavo      | 54706702                        | 1.031828824                         | 49857798                        | 3110425                           | 1738479                        |
| Exp1 72 hpi UL79 <sup>H</sup> F Flavo dTAG | 58189202                        | 0.970076063                         | 53856653                        | 2182385                           | 2150164                        |
| <b>Flavo datasets</b>                      | <b>Corrected human reads</b>    | <b>Corrected CMV reads</b>          | <b>Corrected spike-in reads</b> | <b>Spike-in correction factor</b> | <b>Final correction factor</b> |
| Exp1 72 hpi UL79 <sup>H</sup> F Flavo      | 51444713                        | 3209426                             | 1793813                         | 1.08                              | 1.12                           |
| Exp1 72 hpi UL79 <sup>H</sup> F Flavo dTAG | 52245050                        | 2117079                             | 2085823                         | 0.93                              | 0.90                           |
| <b>Time course datasets</b>                | <b>Total deduplicated reads</b> | <b>Total read correction factor</b> | <b>Human mapped reads</b>       | <b>CMV mapped reads</b>           | <b>Spike-in mapped reads</b>   |
| Exp2 12 hpi WT Flavo                       | 53088646                        | 1.141981960                         | 49677875                        | 289499                            | 3121272                        |
| Exp2 48 hpi WT Flavo                       | 63422084                        | 0.955917437                         | 60358754                        | 1093458                           | 1969872                        |
| Exp2 48 hpi WT PFA Flavo                   | 65368098                        | 0.927459691                         | 63501550                        | 275996                            | 1590552                        |

| Time course datasets     | Corrected human reads | Corrected CMV reads | Corrected Spike-in reads | Spike-in correction factor | Final correction factor |
|--------------------------|-----------------------|---------------------|--------------------------|----------------------------|-------------------------|
| Exp2 12 hpi WT Flavo     | 56731237              | 330603              | 3564436                  | 0.65                       | 0.74                    |
| Exp2 48 hpi WT Flavo     | 57697985              | 1045256             | 1883035                  | 1.23                       | 1.17                    |
| Exp2 48 hpi WT PFA Flavo | 58895128              | 255975              | 1475173                  | 1.56                       | 1.45                    |

### C. ChIP-Seq datasets

| ChIP-Seq datasets                 | Total deduplicated reads | Human mapped reads | CMV reads |
|-----------------------------------|--------------------------|--------------------|-----------|
| Towne UL87 <sup>H</sup> HA        | 82846762                 | 13306092           | 69540670  |
| Towne UL87 <sup>H</sup> Pol II    | 68397980                 | 36266593           | 32131387  |
| TB40/E UL79 <sup>H</sup> F HA     | 28339209                 | 8439843            | 19899366  |
| TB40/E UL79 <sup>H</sup> F Pol II | 30113611                 | 20630155           | 9483456   |
